# Supplementary material for: Investigation of photoelectric behaviors of silver sulfide particles in different surroundings
Source: Royal Society of Chemistry journal article supplement (doi:10.1039/d1ra07864j), 2022-01-01
Supplement: d1ra07864j1.pdf [file d1ra07864j1.pdf]

## Investigation of photoelectric behaviors of silver sulfide particles in different surroundings

Mengmeng Dong, Yanfei Lv, Xue Peng, Shichao Zhao

College of Materials & Environmental Engineering, Hangzhou Dianzi University, Hangzhou, 310018, P. R. China

\* To whom correspondence should be addressed: zhaoshichao@hdu.edu.cn

### Supporting Information

Fig.S1 shows the XRD patterns of  $\text{Ag}_2\text{S}$  particles grown at different temperatures. The strongest peak appeared at different positions, indicating that the crystal quality depends on the growth temperature. The diffraction peak of sulfur were observed in the sample grown at low temperature (Fig.S1 a), indicating the presence of sulfur impurities.

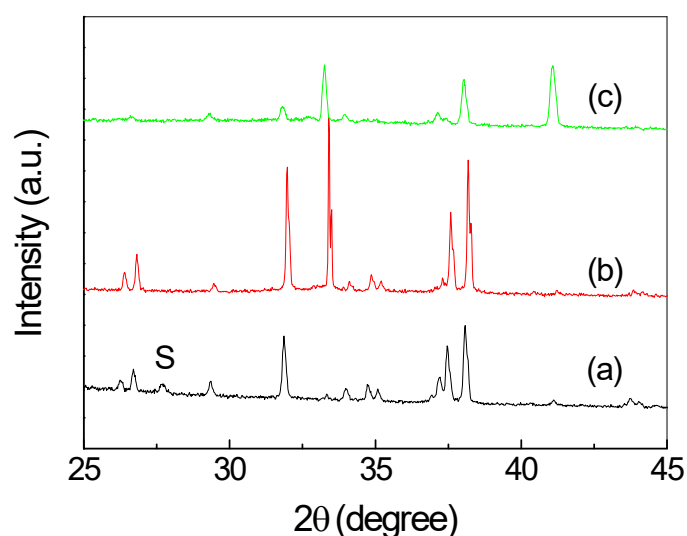

**Fig. S1** X-ray diffraction patterns of  $\text{Ag}_2\text{S}$  particles prepared different temperatures: (a) 100 °C, (b) 150 °C, and (c) 200 °C, respectively. The peak at 27.7 degree is due to sulfur (PDF#08-0247). Other peaks are from silver sulfide (PDF#14-0072).

Fig. S2 shows the I-V curve of pure  $\text{Ag}_2\text{S}$  particle film, which was tested under irradiation at 500 nm. The power of the light was 2.5 mW/mm<sup>2</sup>. The dark and light currents overlapped with the open circuit test current, indicating the  $\text{Ag}_2\text{S}$  film was

not conductive.

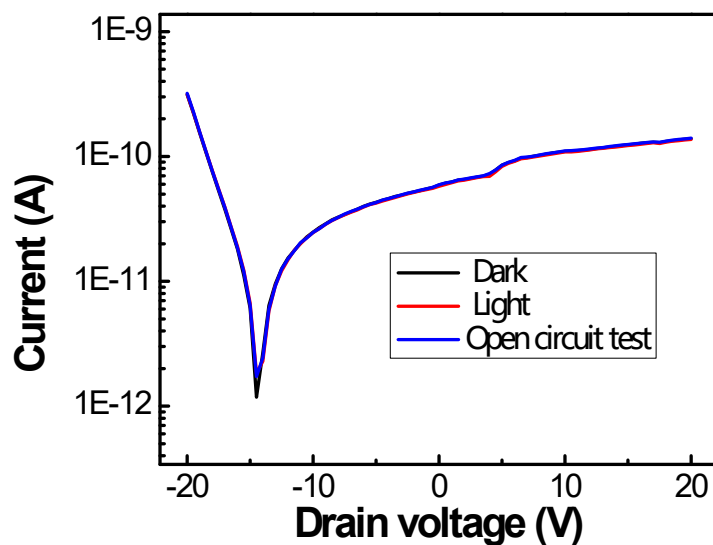

Fig. S2 The I-V curve of Ag<sub>2</sub>S film at the 500 nm.

The conductive type of silver sulfide (Ag<sub>2</sub>S) was tested through a hot-probe method. A voltmeter was connected with the Ag<sub>2</sub>S film. During the test, the positive terminal was heated. If the voltmeter read positive value, the semiconductor was n-type. The result was shown in Fig. S3. We observed that the voltage was positive, indicating Ag<sub>2</sub>S was n-type semiconductor.<sup>1</sup>

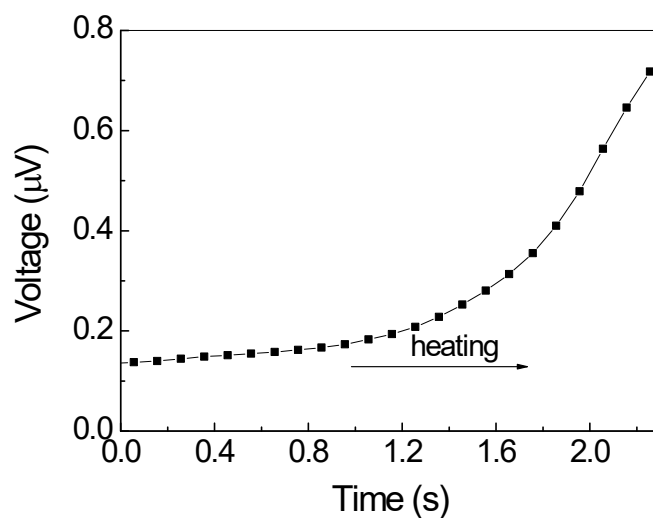

Fig. S3 Hot-probe characteristic for n-type Ag<sub>2</sub>S.

Fig. S4 shows the resistance-time curve of pure Ag<sub>2</sub>S photodetector with/without light exposure in inert atmosphere. We found the resistance of pure Ag<sub>2</sub>S particle film was high and out of the range of the ohmmeter. Therefore, photocurrent effect was not observed.

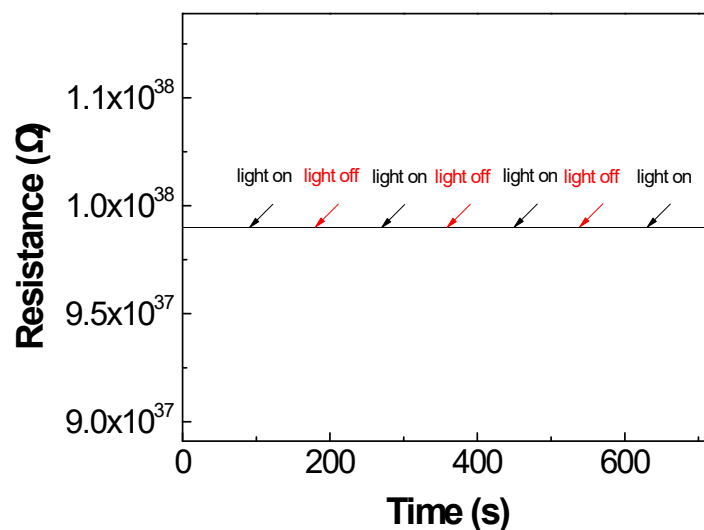

**Fig. S4** The resistance-time curve of Ag<sub>2</sub>S particles with/without light exposure in Ar.

Reference:

1. X. Peng, Y. F. Lv, L. Fu, F. Chen, W. T. Su, J. Z. Li, Q. Zhang and S. C. Zhao, *Rsc Adv*, 2021, **11**, 34095-34100.
